# Supplementary material for: NbN nanodot decorated N-doped graphene as a multifunctional interlayer for high-performance lithium–sulfur batteries
Source: Royal Society of Chemistry journal article supplement (doi:10.1039/d2ta01364a), 2022-01-01
Supplement: d2ta01364a1.pdf [file d2ta01364a1.pdf]

## **NbN Nanodots Decorated N-doped Graphene as Multifunctional Interlayer for High-Performance Lithium-Sulfur Batteries**

*Fei Ma<sup>a#</sup>, Xiaojuan Zhang<sup>a#</sup>, katam Srinivas<sup>a</sup>, Dawei Liu<sup>a</sup>, Ziheng Zhang<sup>a</sup>, Xin Chen<sup>a</sup>, Wanli Zhang<sup>a</sup>, Qi Wu<sup>\*b</sup>, Yuanfu Chen<sup>\*a,b</sup>*

<sup>a</sup> School of Electronic Science and Engineering, and State Key Laboratory of Electronic Thin Films and Integrated Devices, University of Electronic Science and Technology of China, Chengdu 610054, PR China.

<sup>b</sup> College of Science and Institute of Oxygen Supply, Center of Tibetan Studies (Everest Research Institute), Tibet University, Lhasa, 850000, PR China.

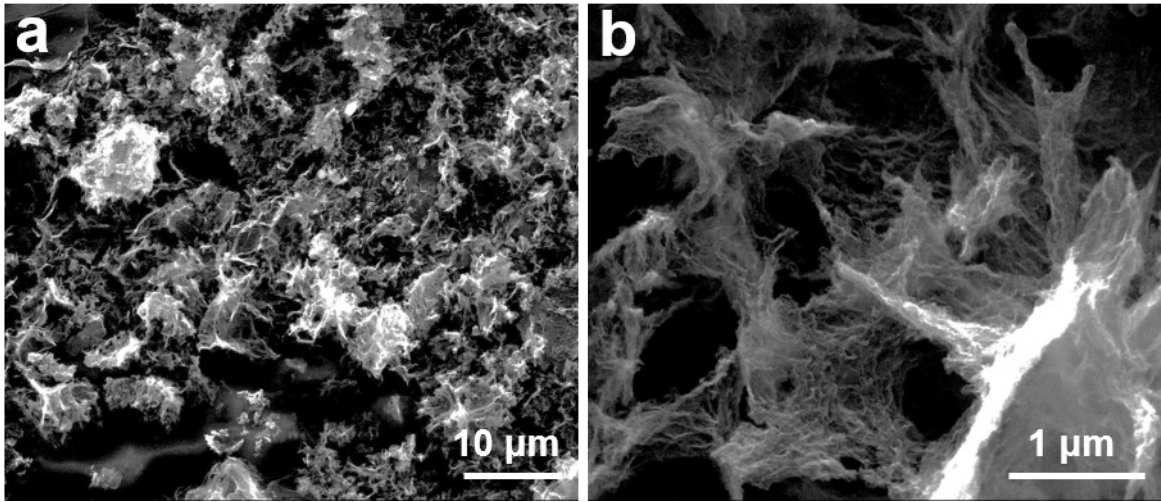

**Fig. S1** FESEM image of the NG at different magnifications.

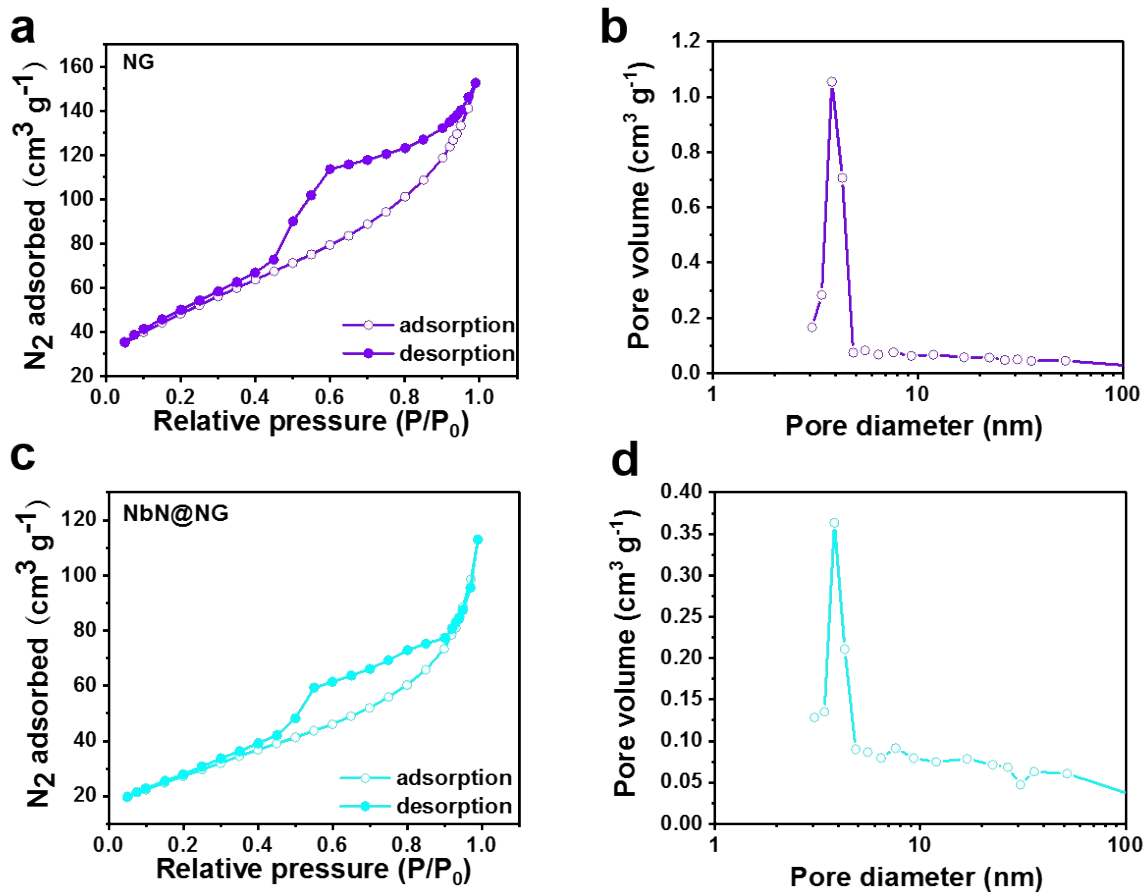

**Fig. S2**  $N_2$  adsorption and desorption isotherms of (a) NG and (b) NbN@NG. Calculated pore size distribution (c) and (d) of NG and (c) NbN@NG.

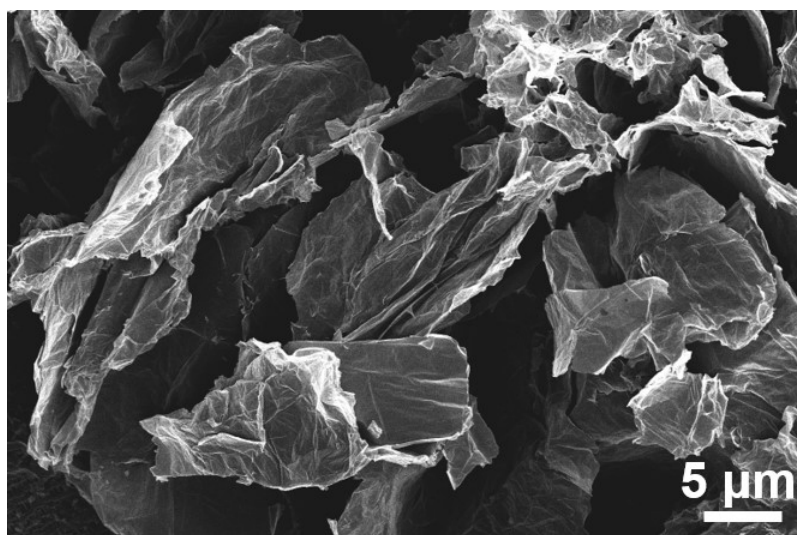

**Fig. S3** SEM images of the top surface for NG modified separators.



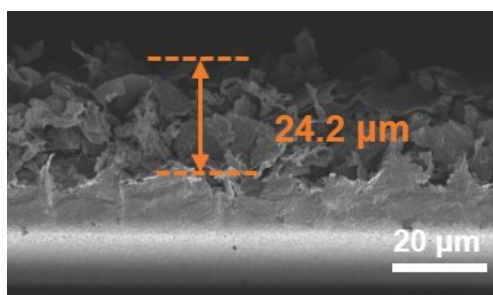

**Fig. S4** Cross-section of NG modified separators.

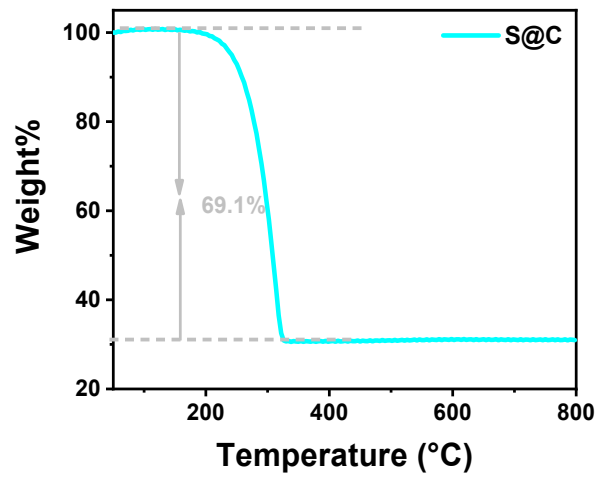

Fig. S5 TGA patterns of S@C.

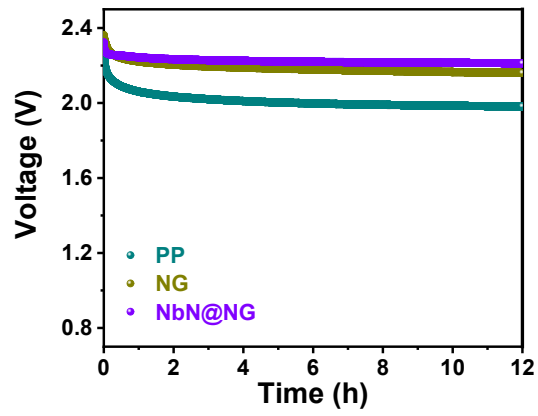

Fig. S6 Self-discharge behavior of the batteries.

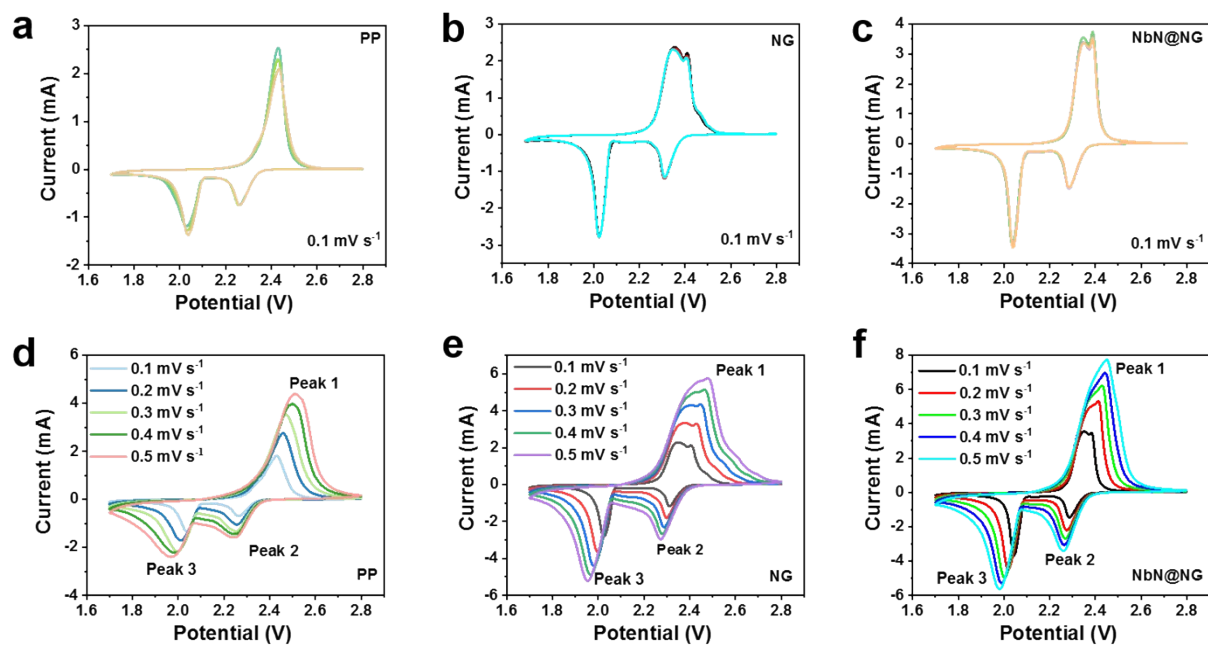

**Fig. S7** CV curves of the batteries with (a) PP, (b) NG, and (c) NbN@NG separators at 0.1 mV s<sup>-1</sup>. CV curves of the batteries with (d) PP, (e) NG, and (f) NbN@NG separators in the range of 0.1-0.5 mV s<sup>-1</sup>.

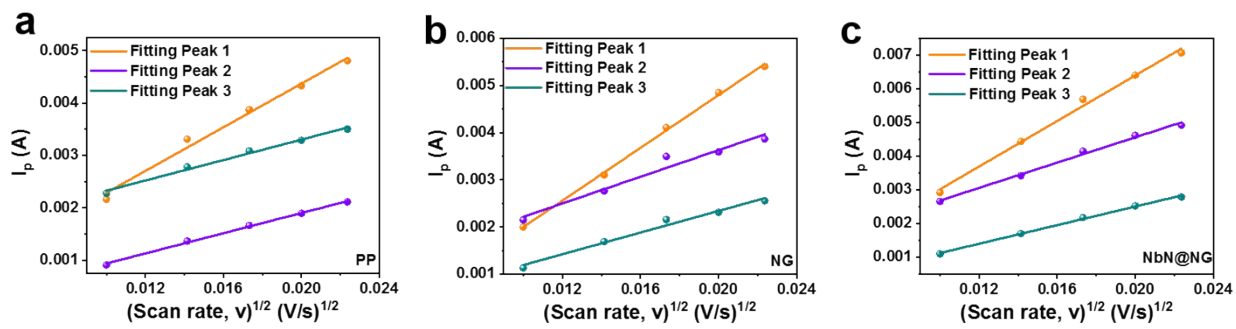

**Fig. S8** (a-c) The linear fitting curves of the peak current as a function of scan rate with different separators.

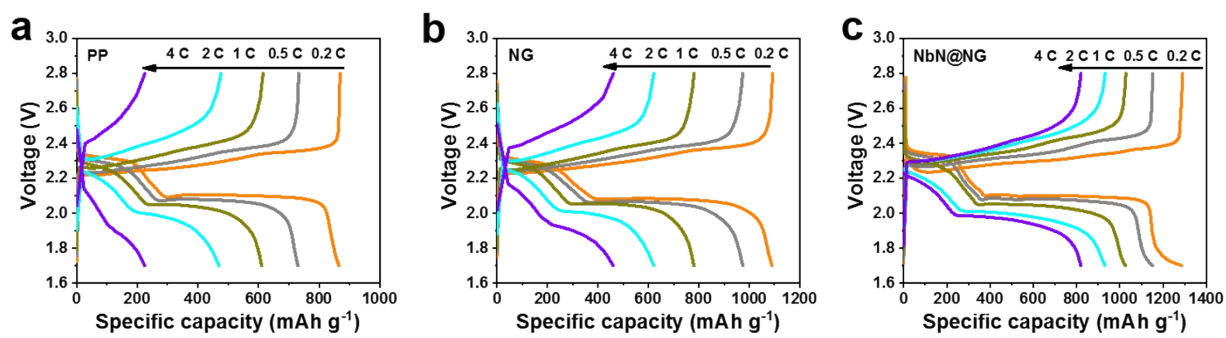

**Fig. S9** Galvanostatic discharging/charging curves of the batteries with (a) PP, (b) NG, and (c) NbN@NG separator at various rates.

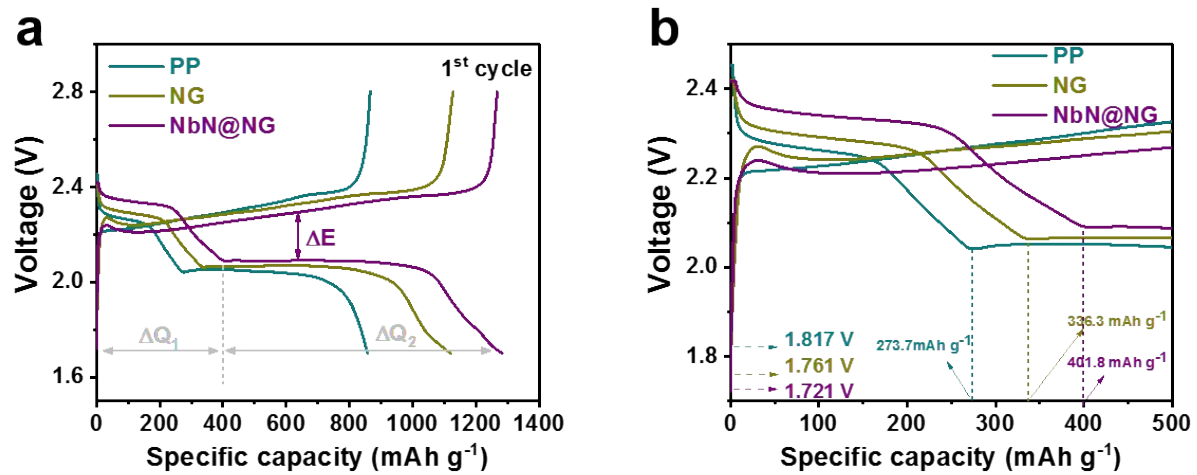

**Fig. S10** (a) Galvanostatic charge/discharge curves of different separators at 0.2 C. (b) The details of charge/discharge curves.

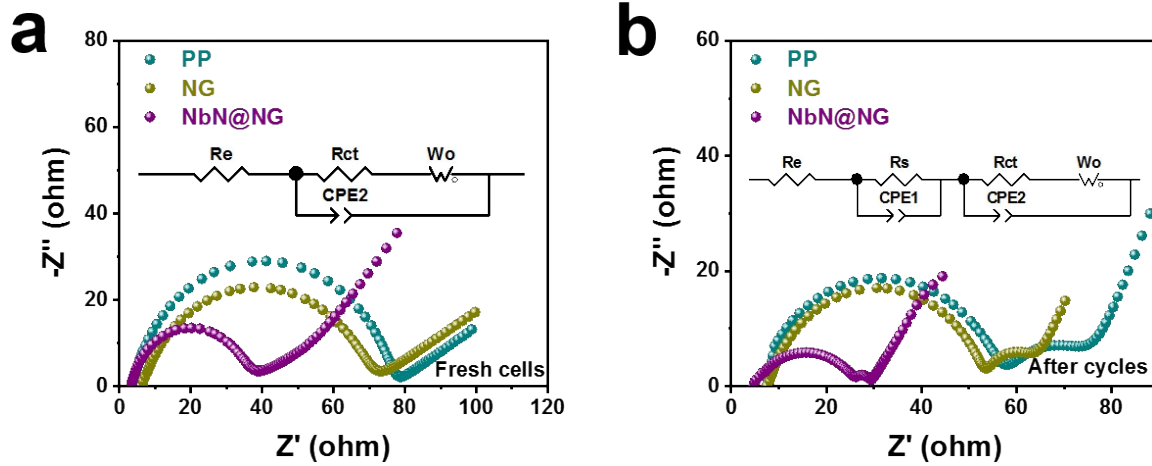

**Fig. S11** Nyquist plots of the batteries with different materials (a) before and (b) after 200 cycles at 0.2 C, insets: the corresponding equivalent circuits.



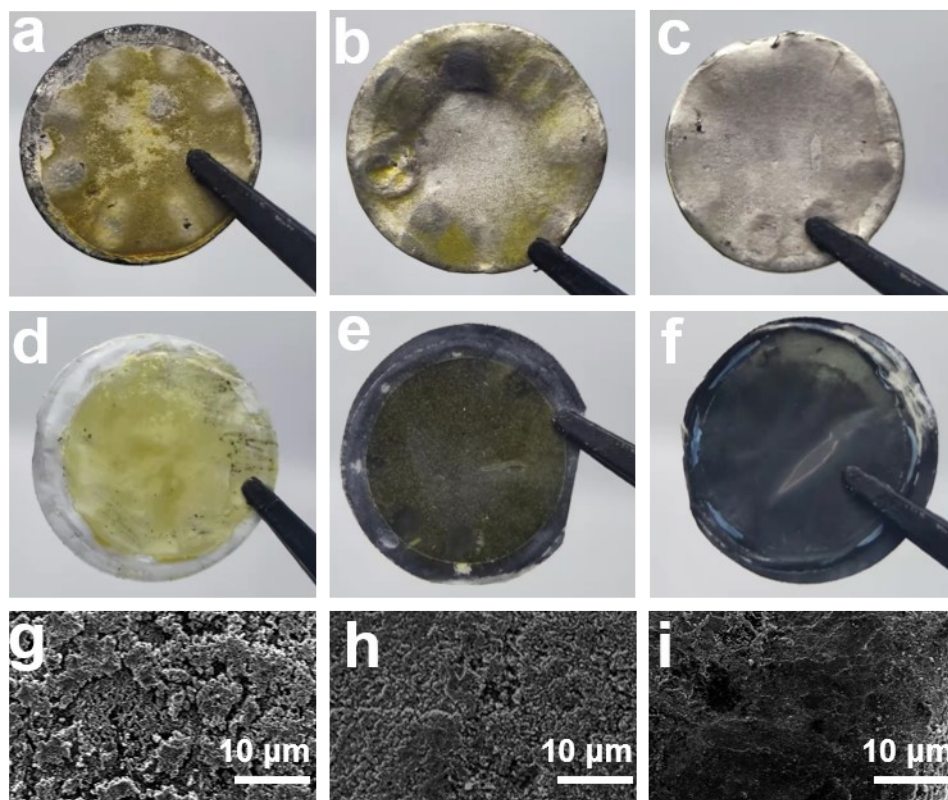

**Fig. S12** Digital images of Li-S batteries after 200 cycles at 0.2 C when paired with (a) PP, (b) NG, (c) NbN@NG separators and (d-f) corresponding Li-metal anodes. (g-i) SEM images of corresponding Li-metal anodes.

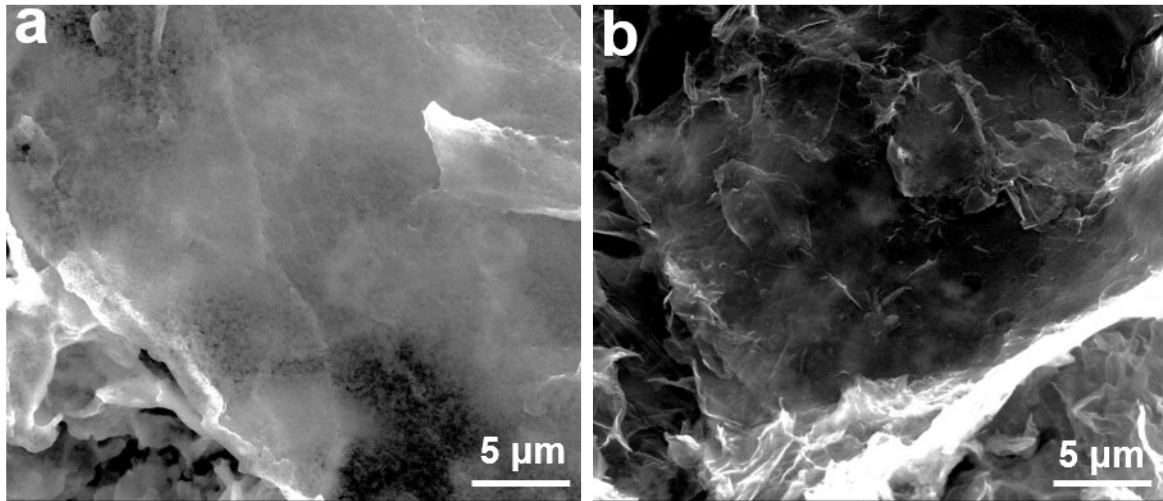

**Fig. S13** FESEM images of the (a) NG and (b) NbN@NG modified separators after 200 cycles at 0.2 C.

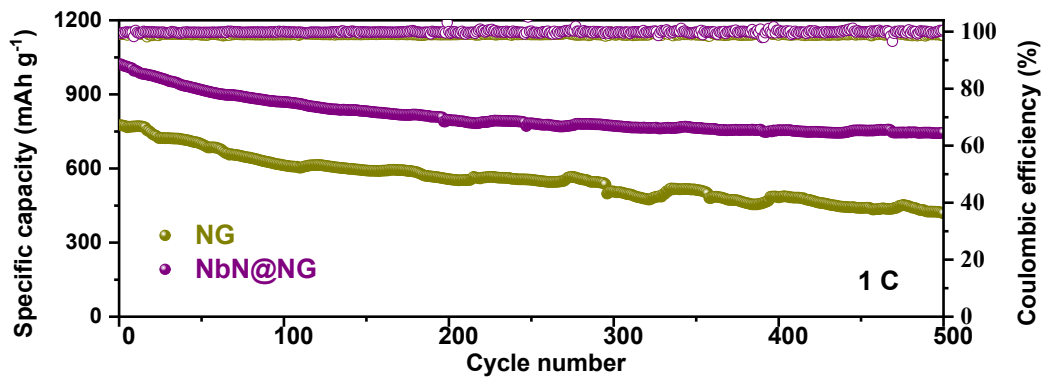

**Fig. S14** Long cycle performance test for the batteries at 1C.

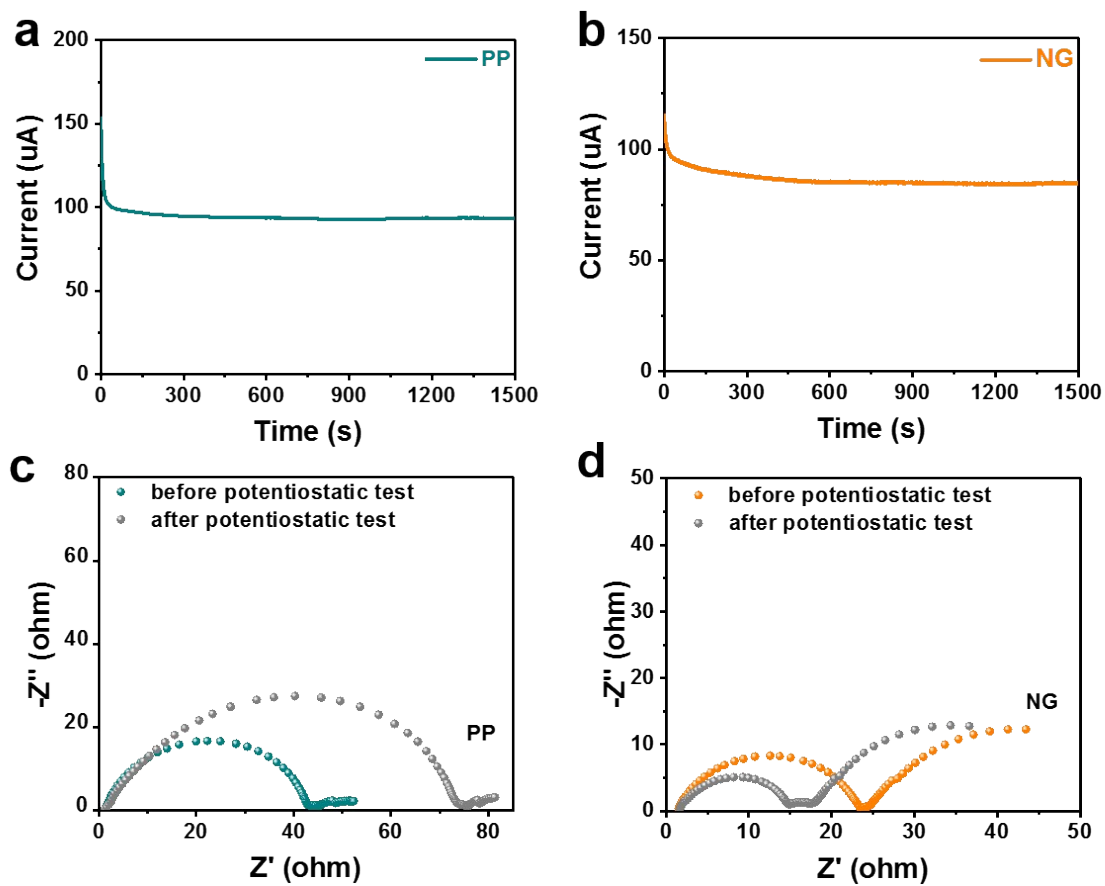

**Fig. S15** I-t curves and the corresponding EIS plots of the batteries with separators of (a, c) PP and (b, d) NG.

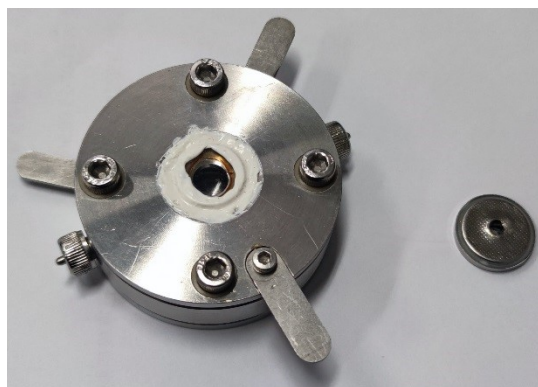

**Fig. S16** Digital photographs of an in-situ Raman test configuration.

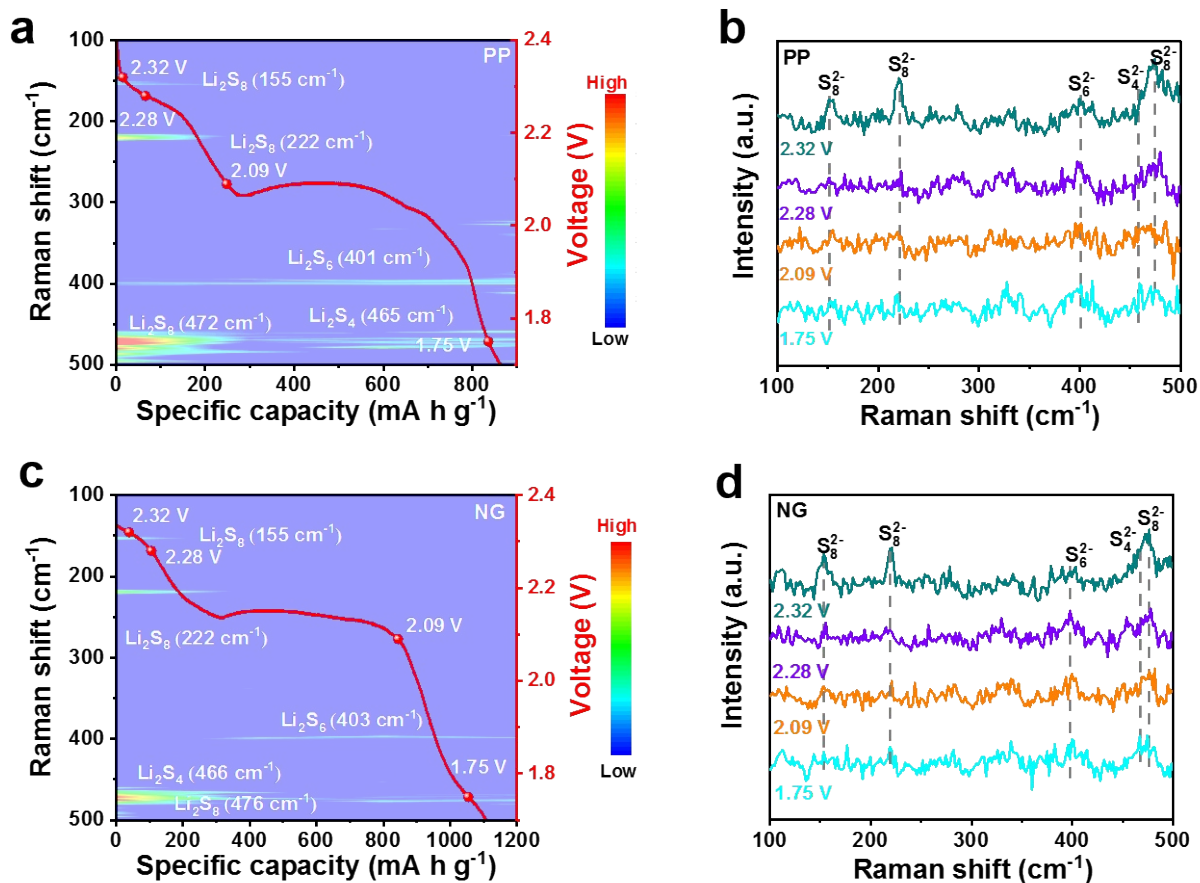

**Fig. S17** (a, c) In situ time-resolved Raman spectra and (b, d) selected Raman spectroscopy of Li-S cells based on PP and NG modified separators during the discharging processes.

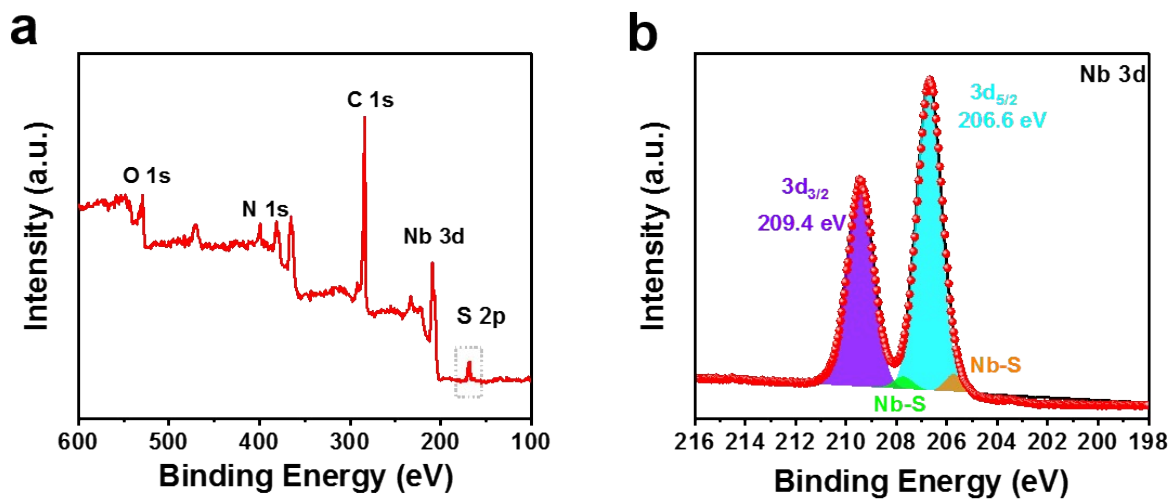

**Fig. S18** (a) XPS spectrum of the NbN@NG + Li<sub>2</sub>S<sub>6</sub> sample. (b) The corresponding Nb 3d XPS spectrum after LiPSs adsorption test.

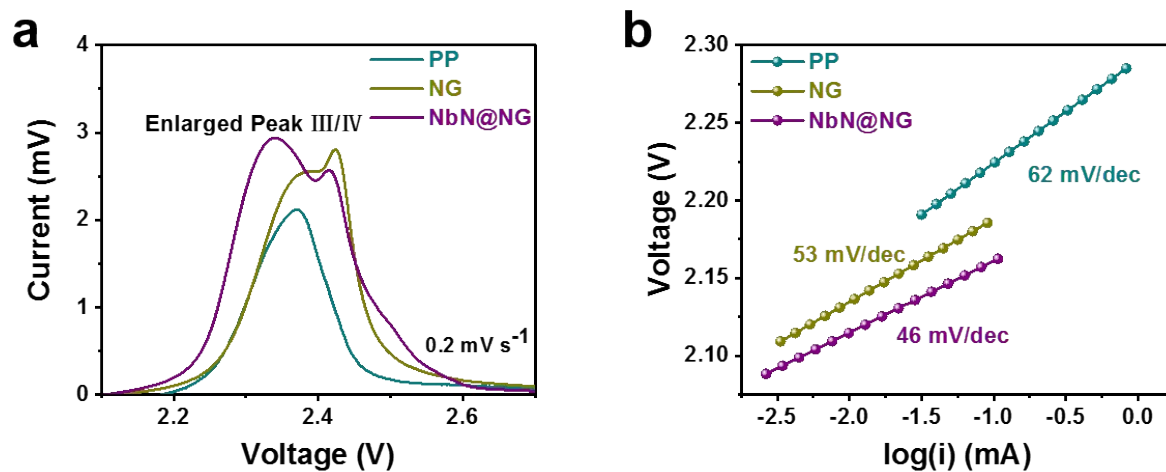

**Fig. S19** LSV profiles of an enlarged view in (a) peak III and peak IV of Li-S batteries with different separators. (b) Tafel plots calculated from reduction peak II and oxidation peak III.



**Table S1.** Summary of electrochemical parameters of different separators

| Modified separator                                             | PP                     | NG                     | NbN@NG                 |
|----------------------------------------------------------------|------------------------|------------------------|------------------------|
| $D_{\text{Li}^+}$ at peak 1<br>( $\text{cm}^2 \text{s}^{-1}$ ) | $6.779 \times 10^{-8}$ | $1.211 \times 10^{-7}$ | $2.227 \times 10^{-7}$ |
| $D_{\text{Li}^+}$ at peak 2<br>( $\text{cm}^2 \text{s}^{-1}$ ) | $1.444 \times 10^{-8}$ | $3.115 \times 10^{-8}$ | $5.538 \times 10^{-8}$ |
| $D_{\text{Li}^+}$ at peak 3<br>( $\text{cm}^2 \text{s}^{-1}$ ) | $1.504 \times 10^{-8}$ | $2.072 \times 10^{-8}$ | $2.984 \times 10^{-8}$ |
| $\text{Li}^+$ conductivity<br>( $\text{mS cm}^{-1}$ )          | 0.869                  | 0.374                  | 0.765                  |
| $\text{Li}^+$ transfer number                                  | 0.623                  | 0.747                  | 0.876                  |

**Table S2.** EIS fitting results of Li-S batteries paired with different separators before cycling

| Modified separator | PP    | NG    | NbN@NG |
|--------------------|-------|-------|--------|
| $R_e (\Omega)$     | 3.61  | 6.47  | 3.38   |
| $R_{ct} (\Omega)$  | 72.64 | 62.96 | 30.57  |

**Table S3.** EIS fitting results of Li-S batteries paired with different separators after cycling

| Modified separator    | PP    | NbN   | NbN@NG |
|-----------------------|-------|-------|--------|
| $R_e$ ( $\Omega$ )    | 7.55  | 7.38  | 4.63   |
| $R_{ct}$ ( $\Omega$ ) | 50.88 | 45.61 | 22.15  |
| $R_s$ ( $\Omega$ )    | 13.77 | 9.02  | 2.17   |

**Table S4.** Electrochemical performances of this work compared with previous works involving different separators in recently reported literature.

| Modifid separator                   | S loading (mg cm <sup>-2</sup> ) | Coating loading (mg cm <sup>-2</sup> ) | Rate capacity (mA h g <sup>-1</sup> ) | Capacity decay rate/cycle number/<br>C rate | Ref.             |
|-------------------------------------|----------------------------------|----------------------------------------|---------------------------------------|---------------------------------------------|------------------|
| TiN                                 | 1.3                              | 1                                      | 782 (2C)                              | 0.085%/300/2C                               | 1                |
| VN                                  | 1.6                              | 1.52                                   | 760 (2C)                              | 0.077%/800/1C                               | 2                |
| CNT/MoP <sub>2</sub>                | 1.2                              | 0.58                                   | 1223 (0.2C)                           | 0.152%/100/0.2C                             | 3                |
| NbN                                 | 2.0                              | 0.2                                    | 800 (1C)                              | 0.08%/300/1C                                | 4                |
| VSe <sub>2</sub><br>NC@NG           | --                               | 0.07-0.11                              | 6000 (8C)                             | 0.052%/550/2C                               | 5                |
| Co <sub>9</sub> S <sub>8</sub> /CoO | 1.0                              | 0.3                                    | 536 (5C)                              | 0.014%/300/1C                               | 6                |
| CoNi@MP<br>C                        | 1.0-1.5                          | --                                     | 665.3 (4C)                            | 0.087%/500/4C                               | 7                |
| MoS <sub>2</sub>                    | 1.6                              | --                                     | 550 (C)                               | 0.083%/600/0.5C                             | 8                |
| Sb <sub>2</sub> S <sub>3</sub> /CNT | 1.0                              | --                                     | 770 (2C)                              | 0.05%/200/2C                                | 9                |
| Co/mSiO <sub>2</sub> -<br>NCNTs     | 1.15                             | 0.25                                   | 552 (5C)                              | 0.09%/250/1C                                | 10               |
| <b>NbN@NG</b>                       | <b>1.3-1.6</b>                   | <b>0.25-0.28</b>                       | <b>819 (4C)</b>                       | <b>0.036%/500/2C</b>                        | <b>This work</b> |

## References

- 1 B. Qi, X. Zhao, S. Wang, K. Chen, Y. Wei, G. Chen, Y. Gao, D. Zhang, Z. Sun and F. Li, *J. Mater. Chem. A*, 2018, **6**, 14359-14366.
- 2 Y. Song, S. Zhao, Y. Chen, J. Cai, J. Li, Q. Yang, J. Sun and Z. Liu, *ACS Appl. Mater. Interfaces*, 2019, **11**, 5687-5694.
- 3 Y. Luo, N. Luo, W. Kong, H. Wu, K. Wang, S. Fan, W. Duan and J. Wang, *Small*, 2018, **14**, 1702853.
- 4 S. Kim, W. Lim, A. Cho, J. Jeong, C. Jo, D. Kang, S. M. Han, J. W. Han and J. Lee, *ACS Applied Energy Mater.*, 2020, **3**, 2643-2652.
- 5 W. Tian, B. Xi, Y. Gu, Q. Fu, Z. Feng, J. Feng and S. Xiong, *Nano Res.*, 2020, **13**, 2673-2682.
- 6 N. Wang, B. Chen, K. Qin, E. Liu, C. Shi, C. He and N. Zhao, *Nano Energy*, 2019, **60**, 332-339.
- 7 R. Luo, Z. Zhang, J. Zhang, B. Xi, F. Tian, W. Chen, J. Feng and S. Xiong, *Small*, 2021, **17**, 2100414.
- 8 Z. A. Ghazi, X. He, A. M. Khattak, N. A. Khan, B. Liang, A. Iqbal, J. Wang, H. Sin, L. Li and Z. Tang, *Adv. Mater.*, 2017, **29**, 1606817.
- 9 S. Yao, J. Cui, J. Q. Huang, Z. Lu, Y. Deng, W. G. Chong, J. Wu, M. Ihsan Ul Haq, F. Ciucci and J. K. Kim, *Adv. Energy Mater.*, 2018, **8**, 1800710.
- 10 D. Fang, Y. Wang, X. Liu, J. Yu, C. Qian, S. Chen, X. Wang and S. Zhang, *ACS Nano*, 2019.
